# Supplementary material
Source: ML conference proceedings conference paper supplement (https://openaccess.thecvf.com/content/CVPR2024/html/Ganz_Question_Aware_Vision_CVPR_2024_paper.html)
Supplement: Supplementary file 1 [file Ganz_Question_Aware_Vision_CVPR_2024_supplemental.pdf]

# Question Aware Vision Transformer for Multimodal Reasoning

## Supplementary Material

### A. Implementation Details

**Overall Training Protocol** For all of the considered architectures, we follow the same general training procedure in which we apply LoRa [23] to the LLM and finetune the projection module. When applying QA-ViT, we also finetune the instruction representation projection MLPs. In particular, we employ LoRa ( $\alpha=32$ ,  $r=16$ ,  $\text{dropout}=0.05$ , and the queries and keys as the target modules) and utilize an AdamW [36] optimizer ( $\beta_1, \beta_2 = 0.9, 0.999$  and  $\epsilon = 1e - 08$ ) with cosine annealing scheduler [35] that decays to  $\times 0.01$  from the base learning rate. In addition, we perform 1000 warm-up steps. We use 8 Nvidia A100 (40G) GPUs in all of our experiments with bfloat16. Next, we provide the specific implementation details regarding ViT+T5, BLIP2, InstructBLIP, and LLaVA-1.5.

**ViT+T5** ViT+T5 is comprised of a CLIP [41] ViT-L vision encoder that operates in a  $336 \times 336$  resolution, coupled with a FLAN-T5 encoder-decoder model [14] using an MLP projection module. The projection component consists of two linear layers that map from the ViT’s dimension  $D_1$  into the LLM’s one  $D_2$  ( $D_1 \rightarrow D_2 \rightarrow D_2$ ). We train three variants of ViT+T5, which differ in the LLM scale, where we consider *base*, *large*, and *x1*. We use the LLM’s encoder as the question encoder and train the models on our multi-task dataset (Sec. 4.1) for 5, 2, and 2 epochs, using a batch size per GPU of 16, 8, and 6, with a learning rate of  $1e - 4$ ,  $5e - 5$  and  $1e - 5$ , respectively. QA-ViT introduces 38M, 45M, and 66M trainable parameters out of the overall 589M, 1,132M, and 3,220M. In addition, when applying QA-ViT to a pretraining-free setup, we observe that using a higher learning rate ( $\times 100$ ) for the projection module stabilizes the training. We hypothesize that while the vision encoder and LLM are pretrained separately, the projection module is randomly initialized, and thus, its weights should be adjusted more than the former counterparts.

**BLIP2 and InstructBLIP** We experiment with both the  $\times 1$  and  $\times \times 1$  models, and similar to the ViT+T5, we use the LLM’s encoder for processing the question before feeding it into QA-ViT. We use a single learning rate group for all models for all the trainable parameters. For the  $\times 1$  models, we train for 2 epochs, with a batch size of 8 per GPU with a base learning rate of  $2e - 5$ . For the  $\times \times 1$  ones, we reduce the batch size to 4 per GPU. In addition, we employ a weight decay of 0.05 for all models.

---

#### Template

---

<image>"A short image caption:"  
<image>"A short image description:"  
<image>"A photo of"  
<image>"An image that shows"  
<image>"Write a short description for the image."  
<image>"Write a description for the photo."  
<image>"Provide a description of what is presented in the photo."  
<image>"Briefly describe the content of the image."  
<image>"Can you briefly explain what you see in the image?"  
<image>"Could you use a few words to describe what you perceive in the photo?"  
<image>"Please provide a short depiction of the picture."  
<image>"Using language, provide a short account of the image."  
<image>"Use a few words to illustrate what is happening in the picture."

---

Table 5. **Captioning instruction templates.** The instruction templates used for the captioning datasets. For VQA, we simply use the provided question.

**LLaVA-1.5** As LLaVA-1.5 is based on a decoder-only LLM, we use the model’s embedding module to process the questions when applying QA-ViT. We train for one epoch with an effective batch size of 4 per GPU (using 2-step gradient accumulation) and a base learning rate of  $5e - 5$ .

### B. Multi-Task Training Dataset and Evaluation

As stated in Sec. 4.1, we utilize a multi-task dataset that contains multiple benchmarks of different tasks. In Tab. 6, we provide a detailed list of the training datasets and the evaluation metric and split used for reporting results throughout the paper.

### C. Image Captioning Templates

For the VQA-based datasets, we simply utilize the provided question to guide QA-ViT. However, in the captioning case, it is infeasible. Thus, we use the captioning templates used in InstructBLIP [15] and provide them in Tab. 5 for completeness. These captions are sampled uniformly during training and inference.

### D. Additional OCR Results

#### D.1. In-Depth Scene-Text analysis

As explained in Sec. 4.5, we view the scene-text benchmarks as an interesting testing bed for our approach. To understand the contribution of QA-ViT for scene-text understanding, we follow the analysis of Ganz et al. [20] and decompose the results of  $VQA^T$  into two non-overlapping subsets – i)  $VQA^T_{\text{See} \cap \text{Read}}$  is the manually curated subset which contains questions that require reasoning over OCR

| Task                    | Dataset            | Description                                | Eval split    | Metric                  |
|-------------------------|--------------------|--------------------------------------------|---------------|-------------------------|
| Image Caption           | COCO               | Captioning of natural images               | karpathy-test | CIDEr( $\uparrow$ )     |
| Scene-Text Caption      | TextCaps           | Text-oriented captioning of natural images | validation    | CIDEr( $\uparrow$ )     |
| General VQA             | VQA <sup>v2</sup>  | VQA on natural images                      | test-dev      | vqa-score( $\uparrow$ ) |
|                         | Visual Genome      | VQA on natural images                      | -             | -                       |
| Scene-Text VQA          | VQA <sup>T</sup>   | Text-oriented VQA on natural images        | validation    | vqa-score( $\uparrow$ ) |
|                         | VQA <sup>ST</sup>  | Text-oriented VQA on natural images        | test          | ANLS( $\uparrow$ )      |
|                         | VQA <sup>OCR</sup> | Text-oriented VQA on book covers           | -             | -                       |
| Documents Understanding | DocVQA             | VQA on scanned documents                   | test          | ANLS( $\uparrow$ )      |
|                         | InfoVQA            | VQA on infographic images                  | test          | ANLS( $\uparrow$ )      |
|                         | ChartQA            | VQA on chart images                        | -             | -                       |

Table 6. **Training datasets and evaluation.** The datasets used for training alongside their evaluation split and metric, if applicable.

| Method       | LLM        | Scene-Text       |                                  |                                                      | Documents   |             |             |
|--------------|------------|------------------|----------------------------------|------------------------------------------------------|-------------|-------------|-------------|
|              |            | VQA <sup>T</sup> | VQA <sup>T</sup> <sub>Read</sub> | VQA <sup>T</sup> <sub>See<math>\cap</math>Read</sub> | DocVQA      | InfoVQA     | Average     |
| ViT+T5-xl    | Flan-T5-xl | 48.0             | 49.3                             | 35.6                                                 | 42.3        | 26.4        | 34.4        |
| + QA-ViT     |            | 50.3             | 51.8                             | 36.2                                                 | 44.2        | 27.1        | 35.7        |
| $\Delta$     |            | <b>+2.3</b>      | <b>+2.5</b>                      | <b>+0.6</b>                                          | <b>+1.9</b> | <b>+0.7</b> | <b>+1.3</b> |
| BLIP2        | Flan-T5-xl | 34.5             | 36.1                             | 18.7                                                 | 16.1        | 21.1        | 18.6        |
| + QA-ViT     |            | 36.6             | 38.3                             | 20.4                                                 | 17.1        | 21.2        | 19.2        |
| $\Delta$     |            | <b>+2.1</b>      | <b>+2.2</b>                      | <b>+1.7</b>                                          | <b>+1.0</b> | <b>+0.1</b> | <b>+0.6</b> |
| InstructBLIP | Flan-T5-xl | 36.2             | 37.9                             | 19.3                                                 | 17.3        | 19.9        | 18.6        |
| + QA-ViT     |            | 37.4             | 39.0                             | 22.5                                                 | 18.2        | 20.5        | 19.3        |
| $\Delta$     |            | <b>+1.2</b>      | <b>+1.1</b>                      | <b>+3.2</b>                                          | <b>+0.9</b> | <b>+0.6</b> | <b>+0.7</b> |
| LLaVa-1.5    | Vicuna-7B  | 57.4             | 59.0                             | 42.5                                                 | 44.1        | 32.1        | 38.1        |
| + QA-ViT     |            | 59.1             | 60.7                             | 43.5                                                 | 45.4        | 32.1        | 38.8        |
| $\Delta$     |            | <b>+1.7</b>      | <b>+1.7</b>                      | <b>+1.0</b>                                          | <b>+1.3</b> | <b>0.0</b>  | <b>+0.7</b> |

Table 7. **Additional OCR Results.** Results on documents understanding and comprehensive VQA<sup>T</sup> analysis.

and visual information simultaneously. We view this subset as the most challenging one. ii) VQA<sup>T</sup><sub>Read</sub> is composed of questions that can be answered solely by using the OCR information. The unification of these subsets results in the entire VQA<sup>T</sup> validation set. We provide the results on these subsets on the middle section of Tab. 7. As can be seen, QA-ViT improves the results on VQA<sup>T</sup><sub>Read</sub> in all the models. This highlights the ability of our method to better harness some of the overlooked OCR information. In addition, it leads to consistent improvements on the VQA<sup>T</sup><sub>See $\cap$ Read</sub>, which requires cross-modal reasoning over the OCR and visual cues.

## D.2. Documents Understanding

In this section, we present the performance results of both QA-ViT and the various baseline models in the context of document understanding, evaluated on DocVQA and InfoVQA, as detailed in the right section of Tab. 7. DocVQA encompasses questions related to dense-text scanned documents, while InfoVQA is designed for reasoning over infographics. Operating in these domains is highly challenging as it constitutes a substantial domain shift for the CLIP

vision encoder (from natural images to documents and infographics). Moreover, as CLIP is inherently limited in dense-text scenarios, the application of QA-ViT, which specifically targets existing visual features, is not anticipated to yield a significant performance boost in such settings. Despite these challenges, our results, while far from state-of-the-art levels, consistently demonstrate improvements over baseline performance. This underscores the effectiveness of our method in directing visual attention towards OCR information within the given constraints.

## E. Additional Qualitative Results and Analysis

In Fig. 6, we extend the visualizations conducted in the main paper to focus on the alignment of the text queries and visual features and provide additional demonstrations:

- We provide attention visualizations at three levels of granularity within the ViT: (i) before the question fusing, (ii) immediately after it, and (iii) at the final layer. Illustrated in Fig. 6, in (i), the network’s attention spans across the entire visual content, while in (ii) and (iii), it focuses

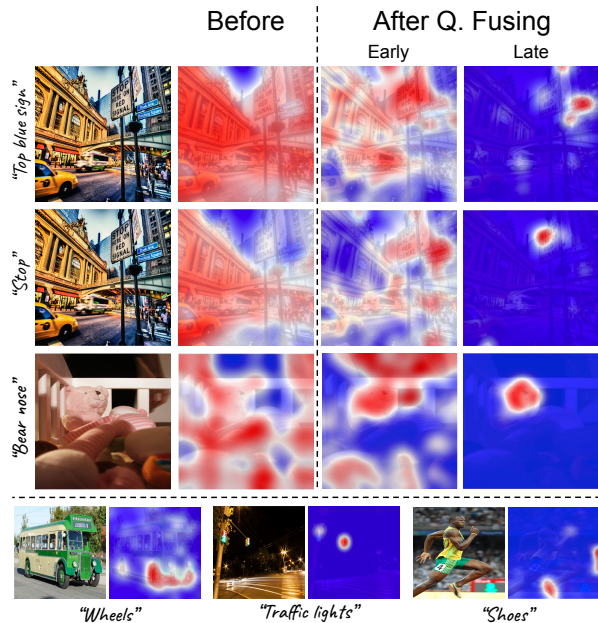

Figure 6. **Elaborated interpretations of QA-ViT.** Additional visual and textual features interaction demonstrations, including visualizations at different granularity levels within the ViT.

on fine-grained details according to the provided text. Specifically, the interaction of the text and vision throughout QA-ViT leads to more focused attention maps, as can be seen in the rightmost two columns.

- To better demonstrate the fine-grained interaction of text and vision in QA-ViT, we show the attention maps of the same image with respect to different text prompts (top two rows). This highlights QA-ViT’s ability to shift the focus of the visual features based on the provided text.
  - The bottom row contains additional visual-textual attention visualization, indicating QA-ViT’s text-based focus.
- In addition, we provide qualitative comparison between QA-ViT and the baseline in Fig. 7.

|                                                                                     |                                                                                     |                                                                                     |                                                                                      |                                                                                       |
|-------------------------------------------------------------------------------------|-------------------------------------------------------------------------------------|-------------------------------------------------------------------------------------|--------------------------------------------------------------------------------------|---------------------------------------------------------------------------------------|
|    |    |    |    |    |
| What is the last letter of the white label?                                         | What color are the letters bms on the board?                                        | What does his nametag say?                                                          | What is the yellow book called?                                                      | How long is this set to cook?                                                         |
| ViT+T5: <b>C</b><br>Ours: <b>S</b>                                                  | ViT+T5: <b>White</b><br>Ours: <b>Green</b>                                          | ViT+T5: <b>Tom</b><br>Ours: <b>Toms</b>                                             | ViT+T5: <b>Backchainer</b><br>Ours: <b>Growing up global</b>                         | ViT+T5: <b>10 minutes</b><br>Ours: <b>1 hour</b>                                      |
|    |    |    |    |    |
| If you turn right, where does the road lead?                                        | What beer is the yellow sign advertising?                                           | What color is the word rolex wrote in?                                              | What is the denomination of this currency?                                           | What brand is the bottle with the black and green label?                              |
| ViT+T5: <b>Hatta Oman</b><br>Ours: <b>Dubai academic city</b>                       | ViT+T5: <b>Alabama</b><br>Ours: <b>Corona</b>                                       | ViT+T5: <b>White</b><br>Ours: <b>Black</b>                                          | ViT+T5: <b>5758872</b><br>Ours: <b>2</b>                                             | ViT+T5: <b>Gatorade</b><br>Ours: <b>Coca cola</b>                                     |
|    |    |    |    |    |
| What does the red sign say?                                                         | What building unit number is above the man's head?                                  | What is the jersey number of the player in the middle?                              | What is the brand of the yellow bin?                                                 | How much is the green bottled beer?                                                   |
| ViT+T5: <b>China</b><br>Ours: <b>Cargo</b>                                          | ViT+T5: <b>32</b><br>Ours: <b>23</b>                                                | ViT+T5: <b>60</b><br>Ours: <b>1</b>                                                 | ViT+T5: <b>Truke</b><br>Ours: <b>Brute</b>                                           | ViT+T5: <b>.45</b><br>Ours: <b>11.4</b>                                               |
|  |  |  |  |  |
| What number is on the back of the man in red shoe's white jersey?                   | What brand is the vcr on top of the tv?                                             | What color are the letters bms on the board?                                        | What does it say next to the microphone?                                             | How tall is this artifact?                                                            |
| BLIP2: <b>13</b><br>Ours: <b>7</b>                                                  | BLIP2: <b>Yaesu</b><br>Ours: <b>Sony</b>                                            | BLIP2: <b>Black</b><br>Ours: <b>Green</b>                                           | BLIP2: <b>Ringtone</b><br>Ours: <b>Voice recorder</b>                                | BLIP2: <b>3.5 inches</b><br>Ours: <b>10.5 cm</b>                                      |
|  |  |  |  |  |
| What number is on the player closest to you?                                        | Where does a left turn take you?                                                    | What is the name on the book?                                                       | Question: What letters are on the player's hat?                                      | Question: What does the red shirt say?                                                |
| InstructBLIP: <b>10</b><br>Ours: <b>19</b>                                          | InstructBLIP: <b>Legacy pony</b><br>Ours: <b>Woods cross</b>                        | InstructBLIP: <b>Yes, sir</b><br>Ours: <b>Yves saint laurent</b>                    | InstructBLIP: <b>Giants</b><br>Ours: <b>Sf</b>                                       | InstructBLIP: <b>Santa claus</b><br>Ours: <b>Safari</b>                               |
|  |  |  |  |  |
| What does the red sign say?                                                         | What is the number on the bottle with the green label?                              | What jersey number currently has possession of the ball?                            | What is the letter to the right of the player?                                       | How much does the battleship cost?                                                    |
| LLaVA-1.5: <b>Reading</b><br>Ours: <b>Recycling</b>                                 | LLaVA-1.5: <b>10</b><br>Ours: <b>1</b>                                              | LLaVA-1.5: <b>42</b><br>Ours: <b>21</b>                                             | LLaVA-1.5: <b>S</b><br>Ours: <b>A</b>                                                | LLaVA-1.5: <b>37.99</b><br>Ours: <b>37.88</b>                                         |

Figure 7. **Additional qualitative results.** Comparison between the baseline and our method on VQA<sup>T</sup> validation set using ViT+T5 (base, large, x1), BLIP2 and InstructBLIP (xx1) and LLaVA-1.5. Success and fail cases are presented on the left and right, respectively.
